# Supplementary material for: An empirical assessment of a single family‐wide hybrid capture locus set at multiple evolutionary timescales in Asteraceae
Source: PubMed Central journal article supplement (PMC6814182; doi:10.1002/aps3.11295), 2019-10-25

**Appendix S14.** *Picris hieracioides* species complex similarity matrices based on the Picris-610-exon-complete (A) and -shrunk (B) and Picris-supercontig (C) data sets, and networks based on the Picris-610-exon-complete (D) and -shrunk (E) data sets (see data set information in Table 2). (A) *Picris* species complex similarity matrix based on 218 exons from the Cichorieae tribe-wide data sets after trimming of spurious sequences and removal of loci that are potentially paralogous across the tribe-wide Cichorieae data set. (B) *Picris* species complex similarity matrix based on 610 exons after trimming of spurious sequences and removal of loci that are potentially paralogous across the *Picris* data set. (C) *Picris* species complex supercontigs similarity matrix based on 576 supercontigs (exons + flanking intron regions) after trimming of spurious sequences and removal of loci that are potentially paralogous across the *Picris* data set). Percentage similarities are given in the boxes; shading corresponds to: darker = more similar, lighter = less similar. Distances between samples are higher in the supercontig data set (C) compared to the two exon data sets (A and B).

A

|                            |       |       |       |       |       |       |       |       |       |
|----------------------------|-------|-------|-------|-------|-------|-------|-------|-------|-------|
| Picris-amalecitana_IZx3x6  |       | 95.4% | 95.3% | 95.8% | 95.2% | 95.5% | 95.6% | 95.6% | 95.8% |
| Picris-nuristanica_NURx7   | 95.4% |       | 97.2% | 97.3% | 97.2% | 97.3% | 97.6% | 97.5% | 97.6% |
| Picris-japonica_JPx106x1   | 95.3% | 97.2% |       | 96.9% | 96.9% | 97.2% | 97.4% | 97.4% | 97.4% |
| Picris-olympica_UDx9       | 95.8% | 97.3% | 96.9% |       | 97.5% | 97.6% | 97.6% | 97.7% | 97.6% |
| Picris-hieracioides_PESK   | 95.2% | 97.2% | 96.9% | 97.5% |       | 97.4% | 97.4% | 97.4% | 97.8% |
| Picris-hieracioides_CZx1x3 | 95.5% | 97.3% | 97.2% | 97.6% | 97.4% |       | 97.8% | 98.2% | 97.8% |
| Picris-hieracioides_PAKx2  | 95.6% | 97.6% | 97.4% | 97.6% | 97.4% | 97.8% |       | 97.9% | 97.9% |
| Picris-hieracioides_LOVx1  | 95.6% | 97.5% | 97.4% | 97.7% | 97.4% | 98.2% | 97.9% |       | 97.9% |
| Picris-hieracioides_MADx4  | 95.8% | 97.6% | 97.4% | 97.6% | 97.8% | 97.8% | 97.9% | 97.9% |       |

B

|                            |       |       |       |       |       |       |       |       |       |
|----------------------------|-------|-------|-------|-------|-------|-------|-------|-------|-------|
| Picris-amalecitana_IZx3x6  |       | 96.7% | 96.8% | 97.0% | 97.0% | 96.9% | 97.1% | 96.9% | 97.2% |
| Picris-nuristanica_NURx7   | 96.7% |       | 98.0% | 97.7% | 97.7% | 97.7% | 98.0% | 97.8% | 97.8% |
| Picris-japonica_JPx106x1   | 96.8% | 98.0% |       | 97.8% | 97.8% | 97.8% | 98.1% | 97.9% | 97.9% |
| Picris-olympica_UDx9       | 97.0% | 97.7% | 97.8% |       | 98.1% | 98.0% | 98.1% | 97.9% | 98.1% |
| Picris-hieracioides_PESK   | 97.0% | 97.7% | 97.8% | 98.1% |       | 98.0% | 98.1% | 97.9% | 98.3% |
| Picris-hieracioides_CZx1x3 | 96.9% | 97.7% | 97.8% | 98.0% | 98.0% |       | 98.2% | 98.1% | 98.1% |
| Picris-hieracioides_PAKx2  | 97.1% | 98.0% | 98.1% | 98.1% | 98.1% | 98.2% |       | 98.1% | 98.3% |
| Picris-hieracioides_LOVx1  | 96.9% | 97.8% | 97.9% | 97.9% | 97.9% | 98.1% | 98.1% |       | 98.1% |
| Picris-hieracioides_MADx4  | 97.2% | 97.8% | 97.9% | 98.1% | 98.3% | 98.1% | 98.3% | 98.1% |       |

C

|                            |       |       |       |       |       |       |       |       |       |
|----------------------------|-------|-------|-------|-------|-------|-------|-------|-------|-------|
| Picris-amalecitana_IZx3x6  |       | 89.5% | 91.1% | 90.2% | 90.4% | 89.6% | 87.8% | 88.6% | 91.4% |
| Picris-nuristanica_NURx7   | 89.5% |       | 94.4% | 92.7% | 93.0% | 92.3% | 91.2% | 91.8% | 93.9% |
| Picris-japonica_JPx106x1   | 91.1% | 94.4% |       | 94.8% | 95.4% | 94.0% | 91.6% | 93.2% | 96.6% |
| Picris-olympica_UDx9       | 90.2% | 92.7% | 94.8% |       | 94.5% | 93.3% | 91.0% | 92.7% | 95.2% |
| Picris-hieracioides_PESK   | 90.4% | 93.0% | 95.4% | 94.5% |       | 94.4% | 91.3% | 92.4% | 95.8% |
| Picris-hieracioides_CZx1x3 | 89.6% | 92.3% | 94.0% | 93.3% | 94.4% |       | 91.3% | 92.4% | 94.2% |
| Picris-hieracioides_PAKx2  | 87.8% | 91.2% | 91.6% | 91.0% | 91.3% | 91.3% |       | 92.0% | 91.4% |
| Picris-hieracioides_LOVx1  | 88.6% | 91.8% | 93.2% | 92.7% | 92.4% | 92.4% | 92.0% |       | 93.2% |
| Picris-hieracioides_MADx4  | 91.4% | 93.9% | 96.6% | 95.2% | 95.8% | 94.2% | 91.4% | 93.2% |       |

**D**

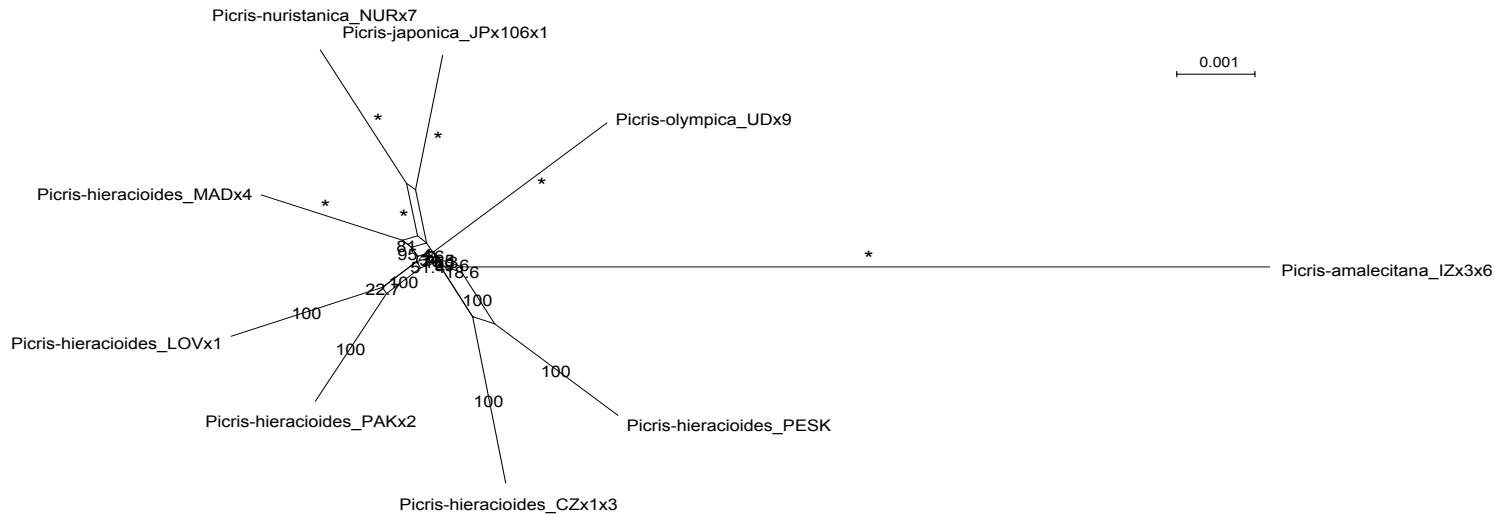

**E**

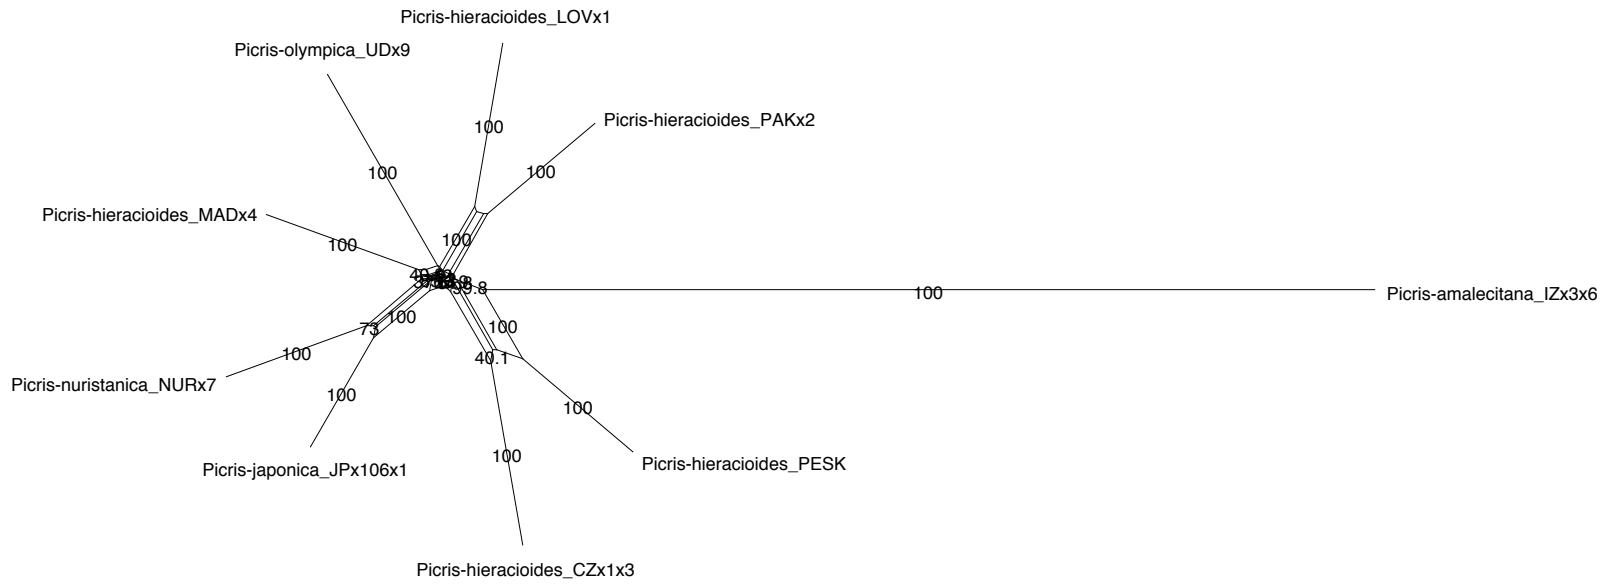

Supplement: APS3-7-e11295-s014.pdf [file APS3-7-e11295-s014.pdf]
