# Supplementary material for: An empirical assessment of a single family‐wide hybrid capture locus set at multiple evolutionary timescales in Asteraceae
Source: PubMed Central journal article supplement (PMC6814182; doi:10.1002/aps3.11295), 2019-10-25

**APPENDIX S8.** Area-proportional Venn diagrams for each tribe illustrating the proportions of non-paralogous loci that are unique to each genus, species complex, or species sampled. \*Species-level sampling within *Carlina vulgaris*, \*\**Picris hieracioides* species complex-level sampling. For total numbers of non-paralogous loci for each genus, refer to Table 1. Refer to Appendix 1 for sample details of each genus.

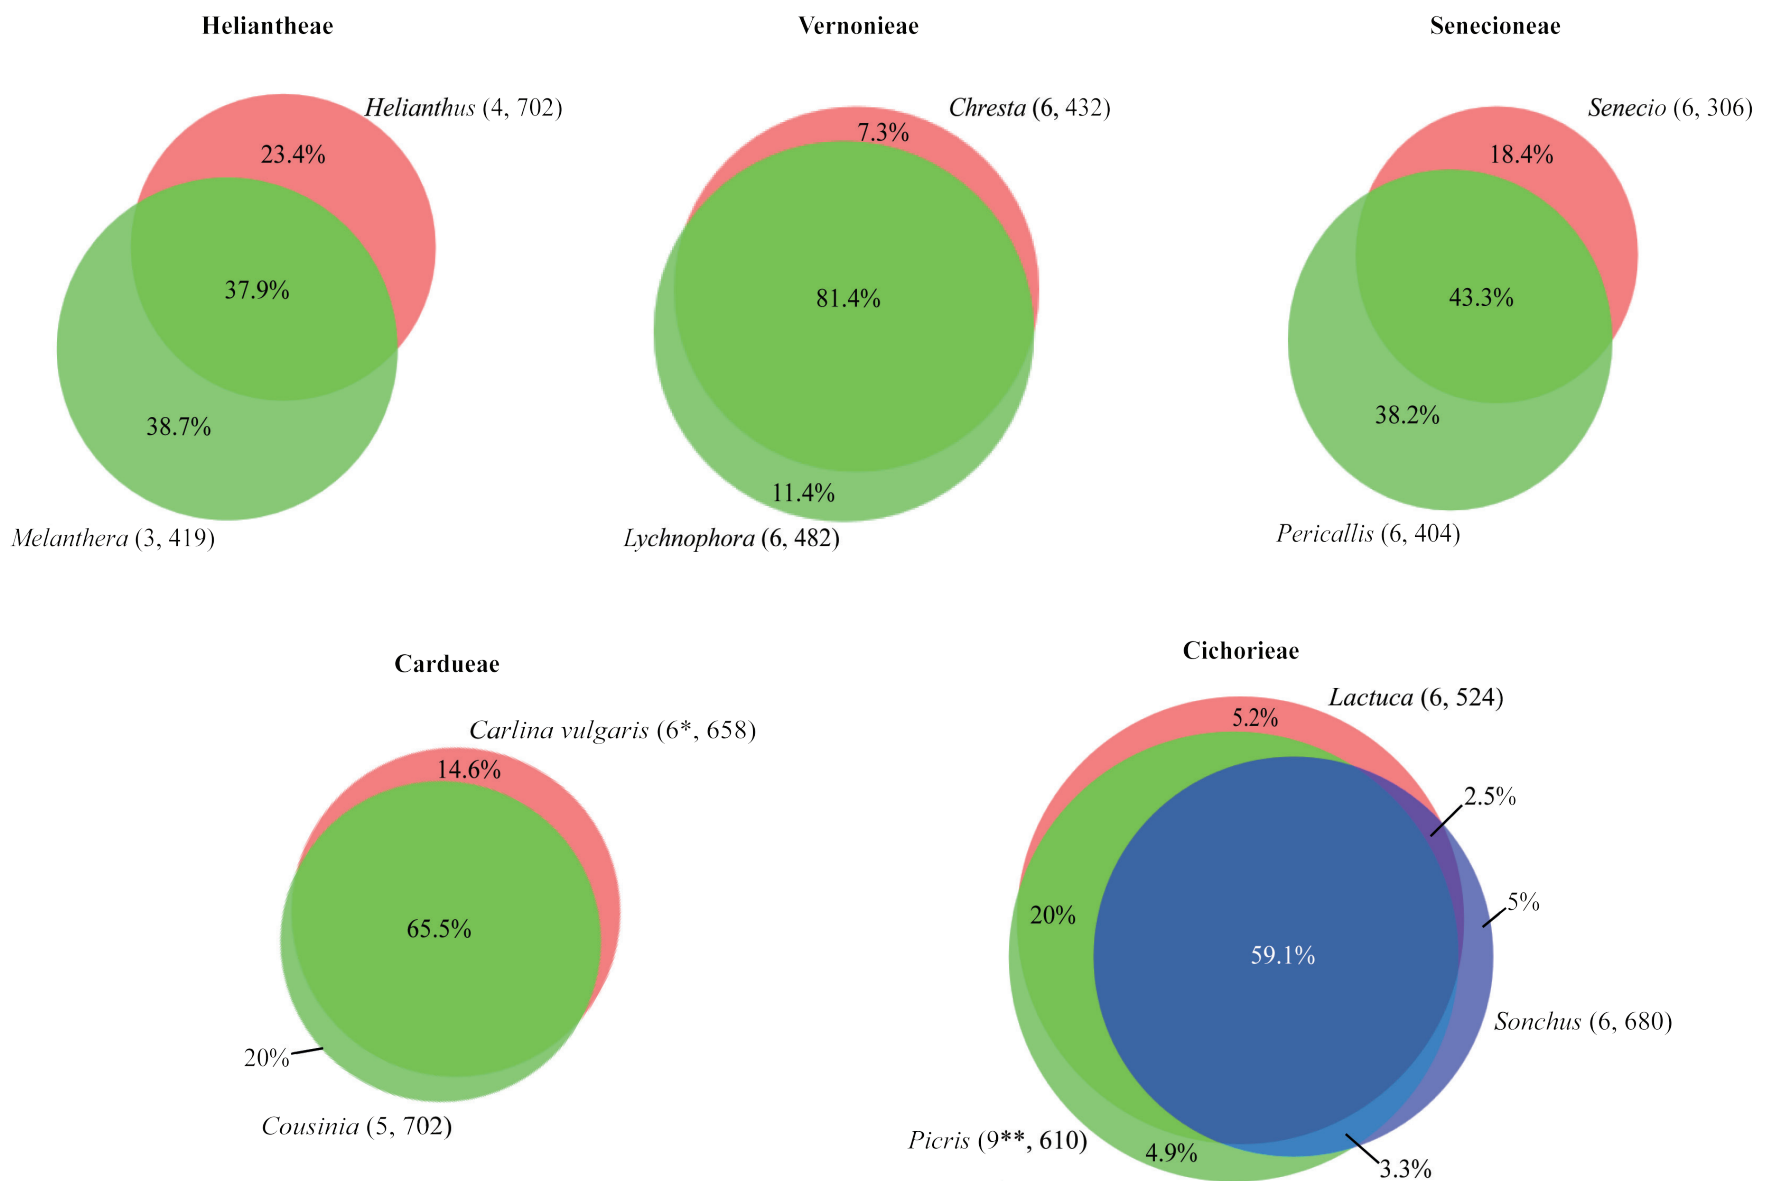

Supplement: APS3-7-e11295-s008.pdf [file APS3-7-e11295-s008.pdf]
