# Supplementary material for: An empirical assessment of a single family‐wide hybrid capture locus set at multiple evolutionary timescales in Asteraceae
Source: PubMed Central journal article supplement (PMC6814182; doi:10.1002/aps3.11295), 2019-10-25

**B**

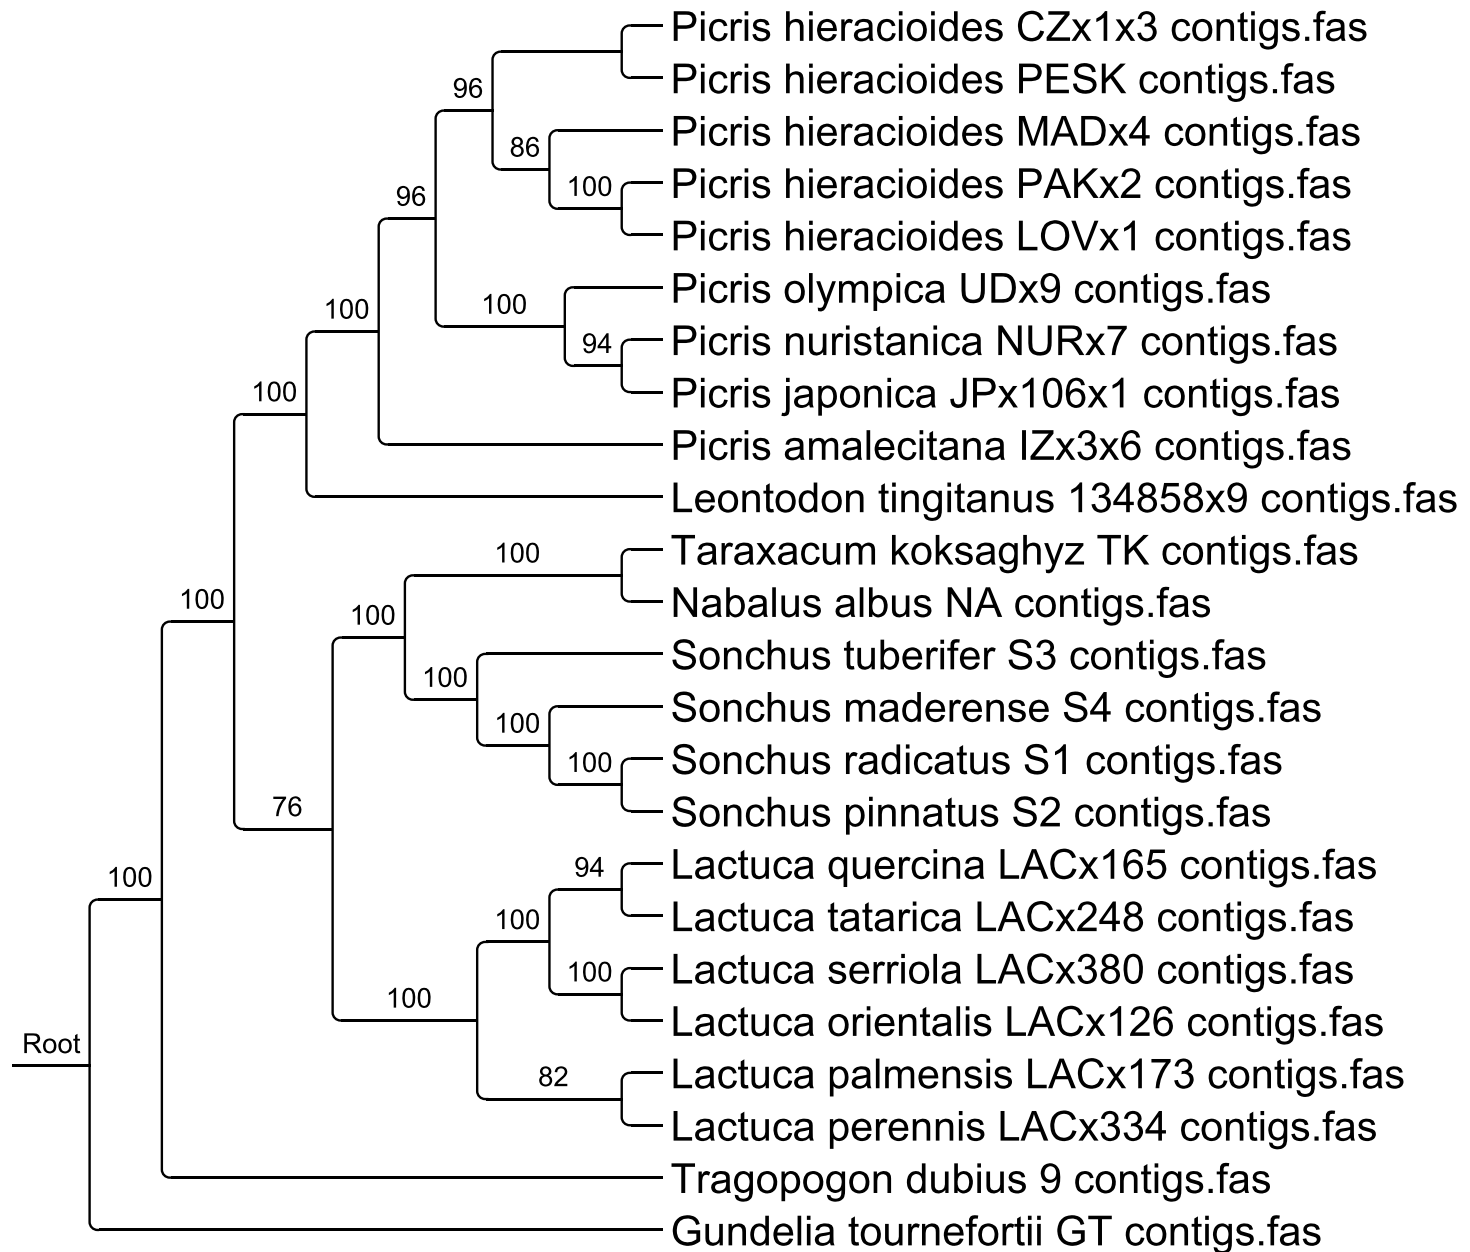

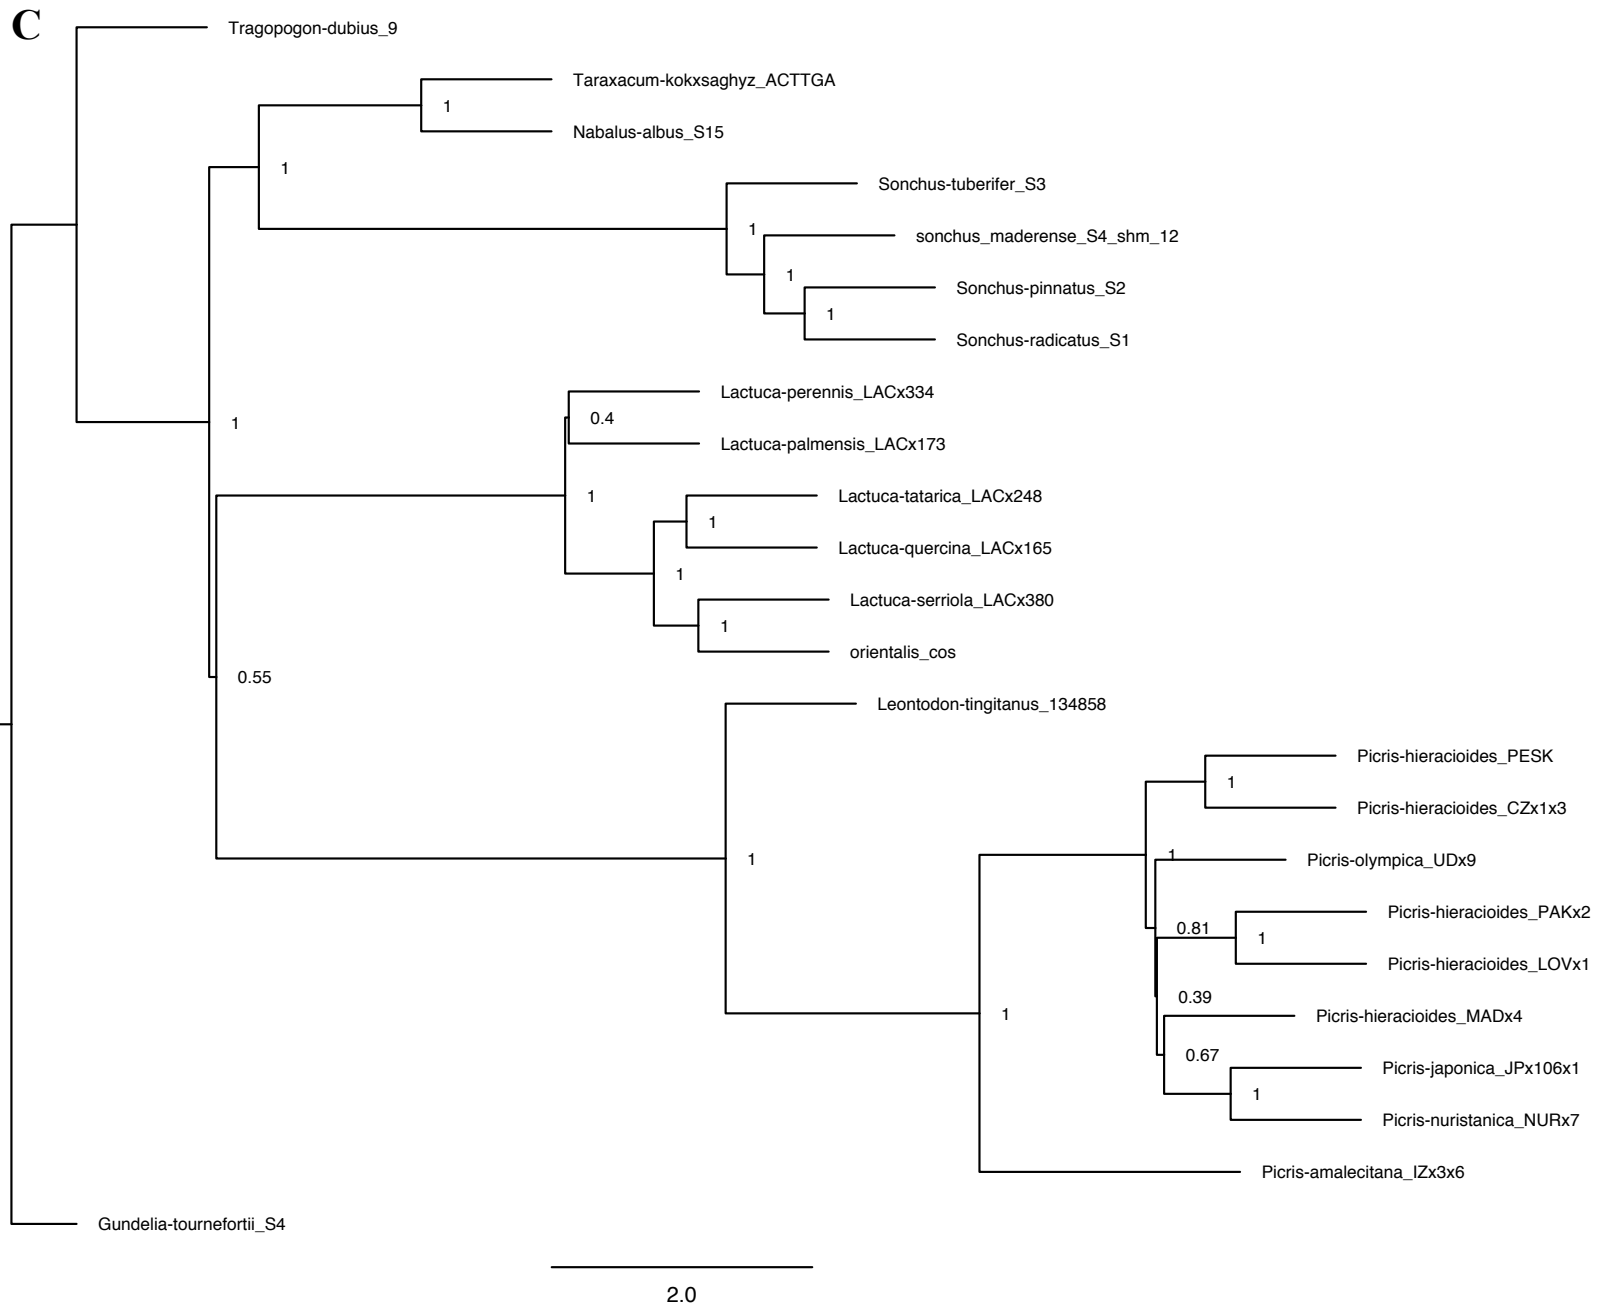

Supplement: APS3-7-e11295-s013.pdf [file APS3-7-e11295-s013.pdf]
