# Supplementary material for: An empirical assessment of a single family‐wide hybrid capture locus set at multiple evolutionary timescales in Asteraceae
Source: Appl Plant Sci. 2019 Oct 25;7(10):e11295. doi: 10.1002/aps3.11295 (PMC6814182; doi:10.1002/aps3.11295)

**APPENDIX S5.** Phylogenetic analyses of the Cichorieae tribe-exon-complete data set (218 loci) revealed inconsistencies in topological inferences for *Picris amalecitana* between maximum likelihood and coalescent species tree (ASTRAL) analyses. RAxML-NG trees are presented (A) without partitioning and (B) with partitioning and substitution models. Green lines in the RAxML-NG tree with partitioning (B) indicate well-resolved nodes that are either unresolved or with lower bootstrap support in the RAxML-NG tree without partitioning (A) and ASTRAL species tree (C). Subtribe names are indicated next to their corresponding nodes. Blue backbone nodes indicate inter-subtribal nodes that are newly resolved compared to previous studies on Cichorieae.

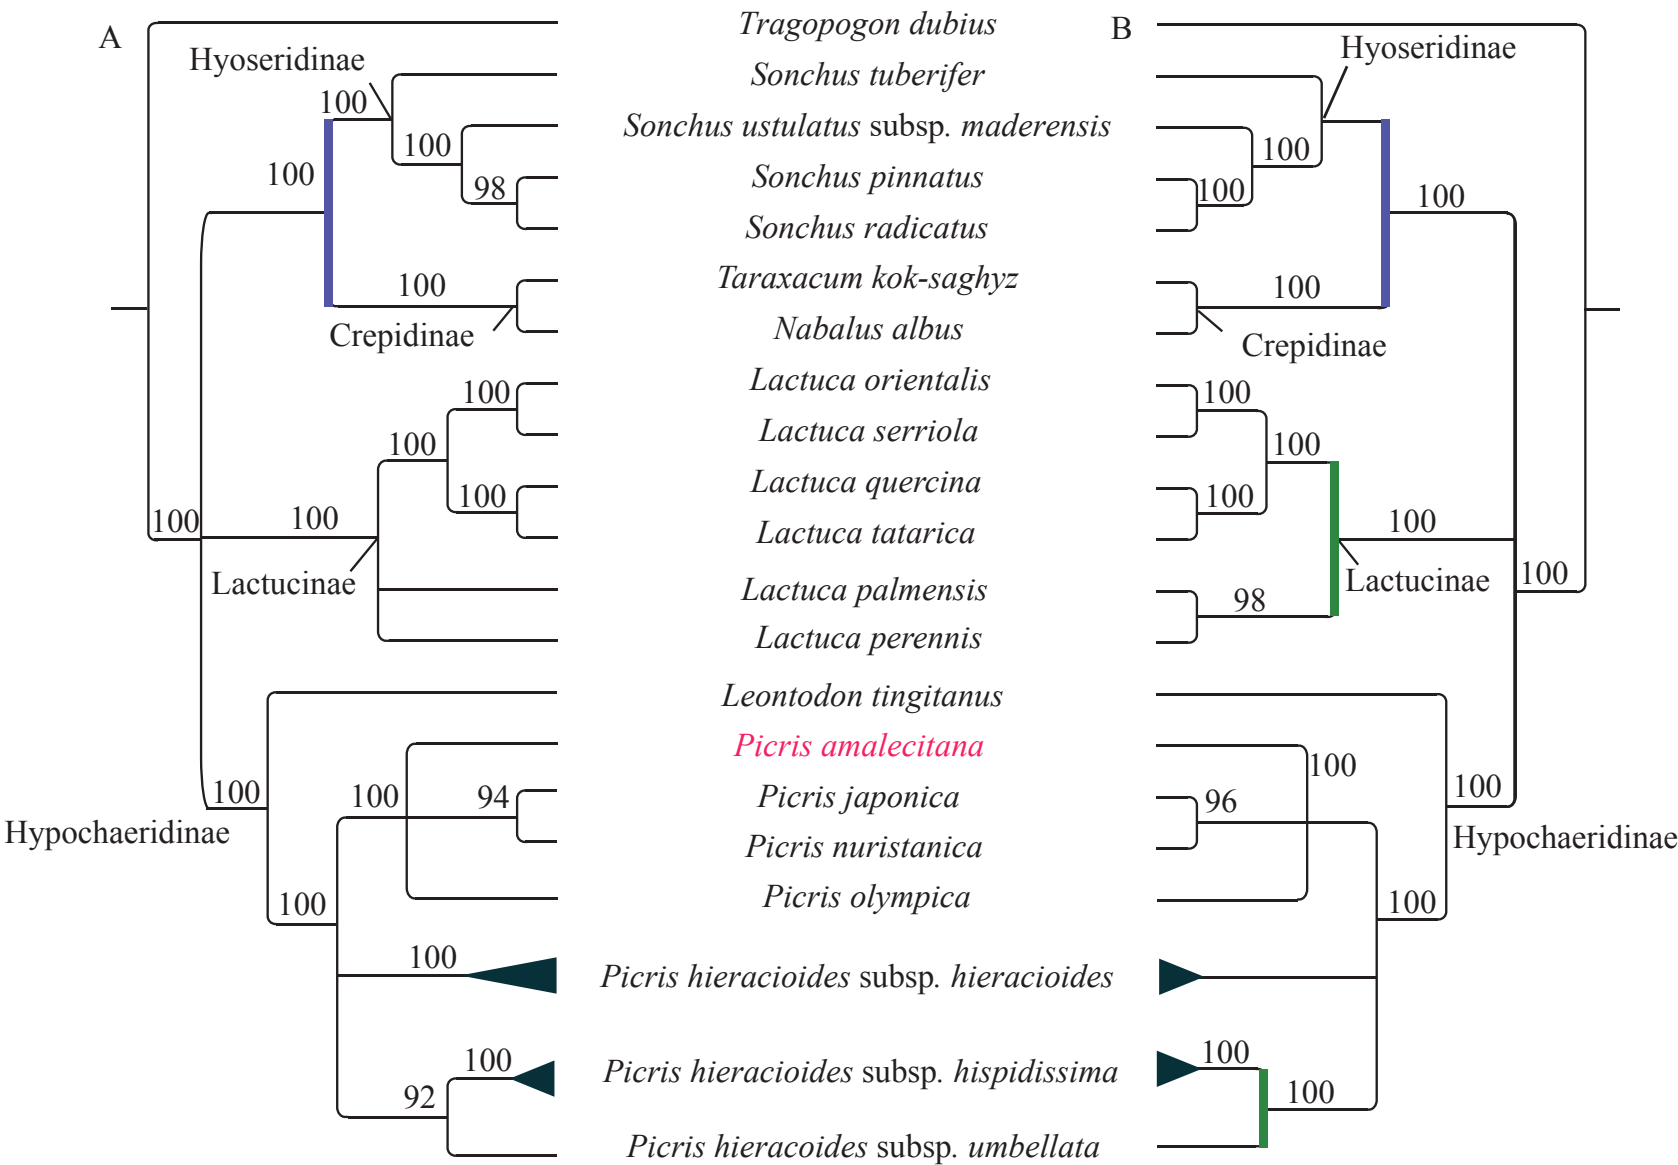

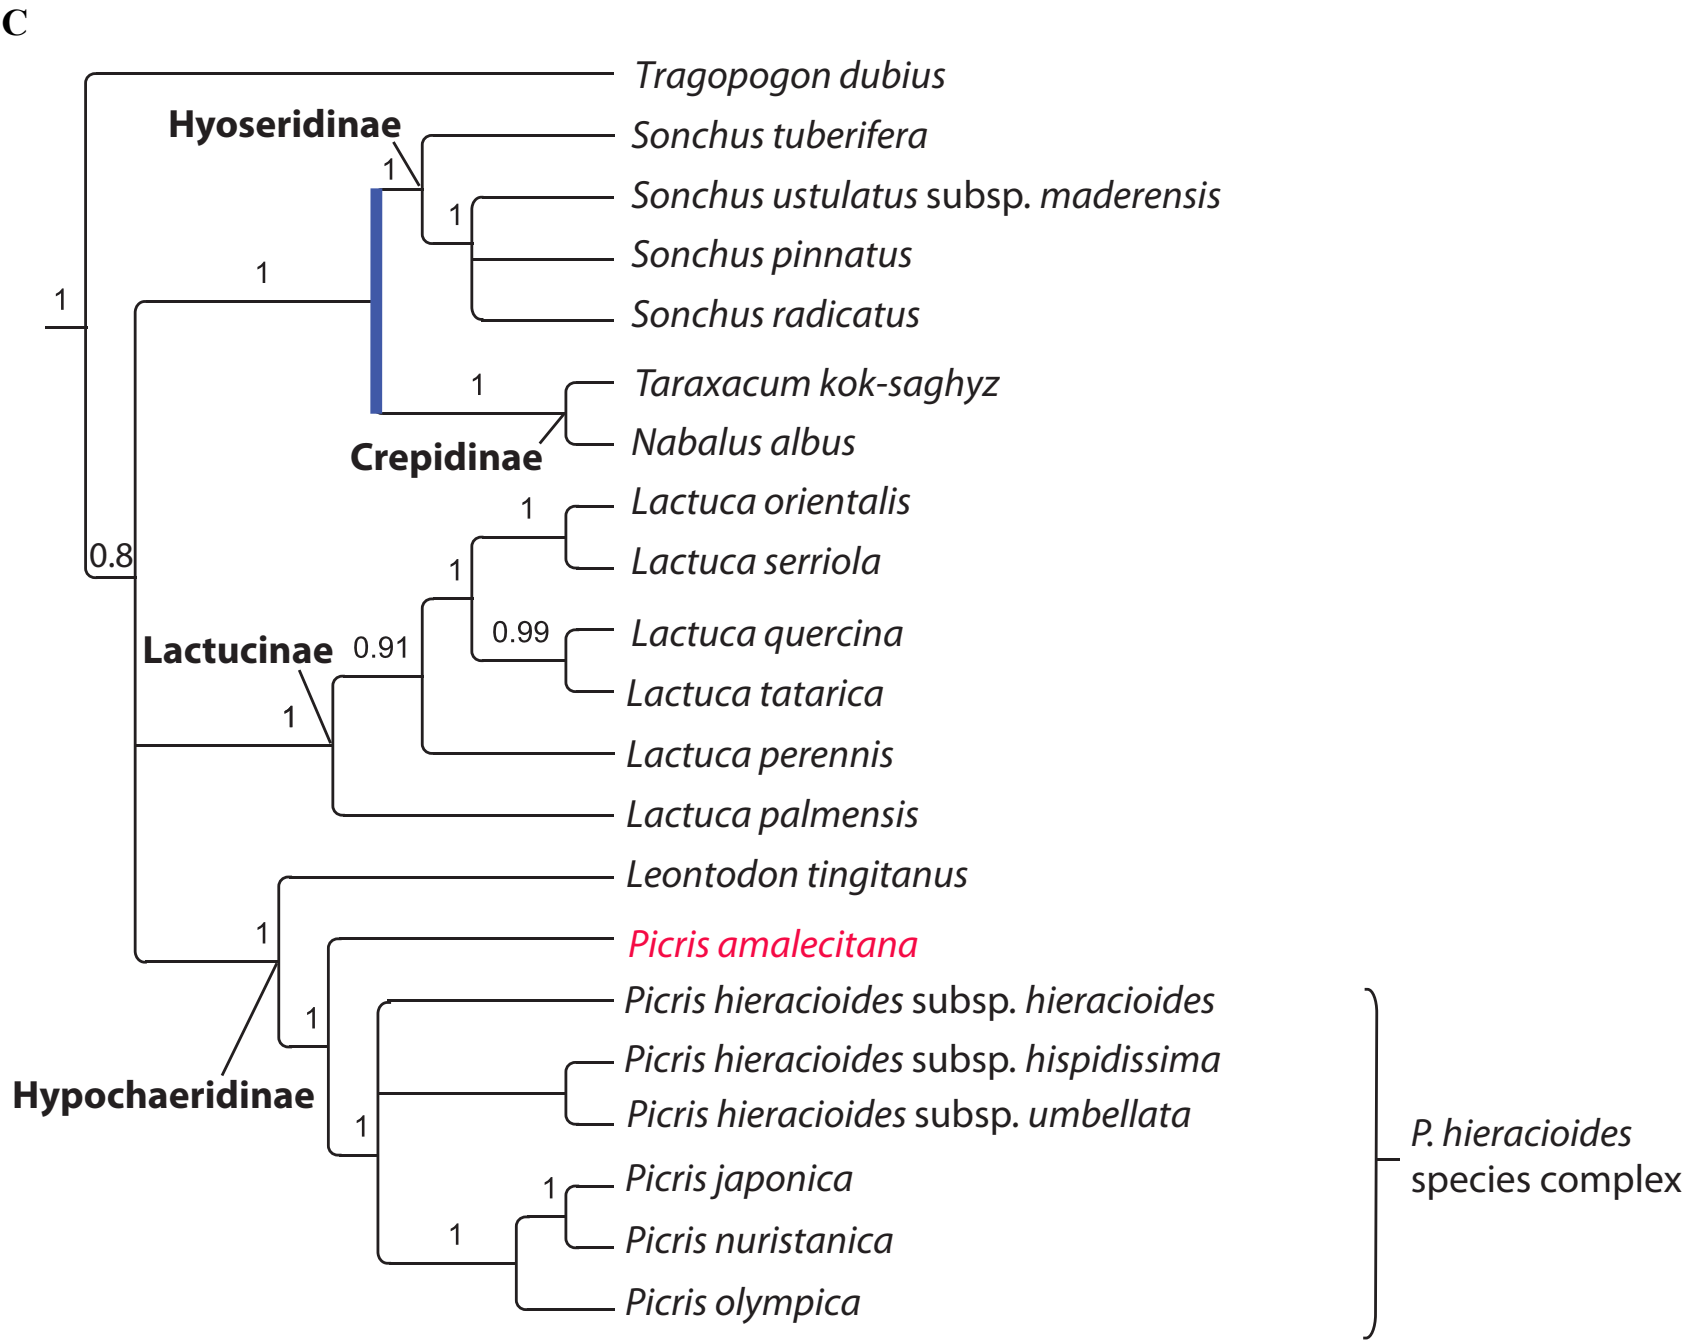

Supplement: Supplementary file 5 — APPENDIX S5. Phylogenetic analyses of the Cichorieae tribe‐exon‐complete data set (218 loci) revealed inconsistencies in topological inferences for Picris amalecitana between maximum likelihood and coalescent species tree (ASTRAL) analyses. [file APS3-7-e11295-s005.pdf]
